# Supplementary material for: Timing and Duration of Sleep in Hospitalized Children: An Observational Study
Source: Oxford University Press journal article supplement (doi:10.1542/hpeds.2018-0236), 2019-05-01
Supplement: hpeds_2018-0236supplementarydata.pdf [file hpeds_2018-0236supplementarydata.pdf]

Supplemental Information

1. How long after going to bed does your child usually fall asleep?
2. Do you think your child has sleeping difficulties?

For questions 3-10, please use the following scale:

- 0 = the sleep behavior never occurs
- 1 = the problem occurs once or twice a month
- 2 = occurs one or two times a week
- 3 = occurs between three and five nights a week
- 4 = the sleep problem happens every night

|                                                                                                       |   |   |   |   |   |
|-------------------------------------------------------------------------------------------------------|---|---|---|---|---|
| 3. The child goes to bed reluctantly.                                                                 | 0 | 1 | 2 | 3 | 4 |
| 4. The child has difficulty getting to sleep at night (and may require a parent to be present).       | 0 | 1 | 2 | 3 | 4 |
| 5. The child does not fall asleep in his or her own bed.                                              | 0 | 1 | 2 | 3 | 4 |
| 6. The child wakes up two or more times in the night.                                                 | 0 | 1 | 2 | 3 | 4 |
| 7. After waking up in the night the child has difficulty falling asleep again by himself or herself.  | 0 | 1 | 2 | 3 | 4 |
| 8. The child sleeps in the parent’s bed at some time during the night.                                | 0 | 1 | 2 | 3 | 4 |
| 9. If the child wakes, he or she uses a comforter (eg, pacifier) and requires a parent to replace it. | 0 | 1 | 2 | 3 | 4 |
| 10. The child wants a drink during the night (including breast or bottle-feed).                       | 0 | 1 | 2 | 3 | 4 |

Caffeine Intake Assessment

1. Does your child ever drink caffeinated beverages (for example: coke, other soda, coffee, energy drinks, sweet tea)?

YESNO
2. If yes, how often (for example: multiple times per day, every day, once a week, twice a week)?
3. Has your child consumed any caffeinated beverages today? If so, how much?

YESNOHow much? \_\_\_\_\_

SUPPLEMENTAL FIGURE 2 TCSQ.

Q:16

**Special Needs Program Care Coordination Intensity Scoring- Medical Fragility Subscale**

|                                                 |      |                                   |                                                                                     |                                                                        |                                     |                                                            |       |
|-------------------------------------------------|------|-----------------------------------|-------------------------------------------------------------------------------------|------------------------------------------------------------------------|-------------------------------------|------------------------------------------------------------|-------|
| Patient:                                        |      | CM:                               |                                                                                     | Date Completed:                                                        |                                     |                                                            |       |
| CM Triggers                                     | 0    | 1                                 | 2                                                                                   | 3                                                                      | 4                                   | 5                                                          | Score |
| Medical Fragility                               |      |                                   |                                                                                     |                                                                        |                                     |                                                            |       |
| Medical Specialists                             | None | 1-2                               | 3-4                                                                                 | 5-7                                                                    | 8-10                                | 11+                                                        |       |
| Clinic Visits/Day Surgery Visits (any location) | None | 1-2 per qtr                       | 3-4 per qtr                                                                         | 5-6 per qtr                                                            | 7-10 per qtr                        | 11+ per qtr                                                |       |
| Emergency Room Utilizations                     | None | 1 per qtr                         | 2 per qtr                                                                           | 3 per qtr                                                              | 4 per qtr                           | 5+ per qtr                                                 |       |
| Hospitalizations/ Short Stays                   | None | 1 per qtr                         | 2 per qtr                                                                           | 3 per qtr                                                              | 4 per qtr                           | 5+ per qtr                                                 |       |
| Hospital Days                                   | None |                                   | 1-4 days per qtr                                                                    | 5-10 days per qtr                                                      | 11-21 days per qtr                  | 22+ days per qtr                                           |       |
| Technology Needs                                |      | Mobility assistance and Orthotics | Pulmonary, cardiorespiratory monitoring, home oxygen, subcutaneous infusion devices | Ostomy, feeding tubes, implanted devices, TPN, noninvasive ventilation | Central vascular lines, tracheotomy | Tracheotomy with invasive ventilation, peritoneal dialysis |       |
| Medications                                     |      | <10 enteral medications           | >10 enteral medications                                                             | Enteral vasoactive medications                                         | IV medications                      | IV vasoactive medications                                  |       |
| Other Factors to Consider:                      |      |                                   |                                                                                     |                                                                        |                                     | Total Score:                                               |       |
|                                                 |      |                                   |                                                                                     |                                                                        |                                     |                                                            |       |
|                                                 |      |                                   |                                                                                     |                                                                        |                                     |                                                            |       |

**Trigger Definitions**

**Medical Specialists:** Specialists that are seen or consulted by the CM or family within the past year. Excludes therapy, radiology, and lab visits.

**Clinic/Day Surgery Visits:** Count number per quarter that patient actually attended, whether CM attended or not. This includes visits at CHW and outside of CHW.

**Hospitalizations/Short Stays:** Count number per quarter that patient actually attended, whether CM attended or not. Short stays = O/N but <23 hours.

**Technology Needs:**

| Category                          | Examples                                                                         |
|-----------------------------------|----------------------------------------------------------------------------------|
| Mobility assistance and orthotics | Wheelchair, AFOs                                                                 |
| Pulmonary                         | Vest, nebulizer, cough assist, suction                                           |
| Cardiorespiratory monitoring      | Pulse oxygen, apnea monitor, cardiac monitor, blood pressure monitoring, Dinamap |
| Ostomy                            | Colostomy, ileostomy, vesicostomy                                                |
| Feeding tubes                     | NG, NJ, GJ, J                                                                    |
| Implanted devices                 | Pacemaker, VNS, baclofen pump, port                                              |
| Noninvasive ventilation           | C-Pap, bi-pap                                                                    |
| Central vascular lines            | Tunneled and nontunneled                                                         |

**Q:17 SUPPLEMENTAL FIGURE 3** Medical Fragility Subscale of Children's Hospital of Wisconsin Special Needs Program Care Coordination Intensity Scoring. AFOs, ankle foot orthosis; CHW, Children's Hospital of Wisconsin; IV, intravenous; NG, nasogastric tube; NJ, nasogastric tube; GJ, gastrojejun tube; J, jejunal tube; O/N, overnight; TPN, total parenteral nutrition; VNS, vagus nerve stimulator.
